# Supplementary material for: The interactions of methyl tert-butyl ether on high silica zeolites: a combined experimental and computational study
Source: Royal Society of Chemistry journal article supplement (doi:10.1039/c3cp51684a), 2013-01-01
Supplement: c3cp51684a.pdf [file c3cp51684a.pdf]

# Supplementary Material

## **The interactions of Methyl *tert*-butyl ether on high silica zeolites: a combined experimental and computational study**

V. Sacchetto<sup>1,2</sup>, G. Gatti<sup>1,2</sup>, G. Paul<sup>1,2</sup>, I. Braschi<sup>2,3</sup>, G. Berlier<sup>4</sup>, M. Cossi<sup>1,2</sup>, L. Marchese<sup>1,2</sup>, R. Bagatin<sup>5</sup>, and C. Bisio<sup>1,2,6\*</sup>

<sup>1</sup>*Department of Science and Technological Innovation and* <sup>2</sup>*Interdisciplinary Nano-SiSTeMI Centre, University of Piemonte Orientale A. Avogadro, Viale T. Michel 11 – 15121 Alessandria, Italy;*

<sup>3</sup>*Department of Agricultural Science, University of Bologna, Bologna, Viale G. Fanin 44 - 40127 Bologna, Italy;*

<sup>4</sup>*Dipartimento di Chimica and NIS Centre of Excellence, University of Torino, Via P. Giuria 7 - 10125 Torino, Italy;*

<sup>5</sup>*Research Center for Non-Conventional Energy, Istituto Eni Donegani, Environmental Technologies, via Felice Maritano 26 - 20097 San Donato Milanese (MI), Italy;*

<sup>6</sup>*ISTM-CNR Istituto di Scienze e Tecnologie Molecolari, via G. Venezian 21 - 20133 Milano, Italy*

### ***Building the mordenite cluster model.***

To model the MTBE-MOR adduct a large cluster ( $\text{Si}_{92}\text{O}_{143}$ ) was extracted from the zeolite periodic structure, featuring a segment of the main channel approximately 14 Å long, with two accessible side-pockets (Figure SM3). The four kinds of tetrahedral sites comprised in the model are shown in Figure SM4.

Then eight tetrahedral atoms (Figure SM3) were removed from 4 T2, 2 T3 and 2 T4 sites, respectively (it is known that T1 sites have the lowest Aluminum concentration in this kind of zeolite), along with eight Oxygen atoms, as shown in Figure SM3: with this choice, the wall between the two adjacent side-pockets was eliminated and a larger, fused cavity was obtained (Figure SM6).

As a consequence, 16 Oxygen atoms were left undercoordinated (Figure SM5) giving rise, ideally, to the same number of silanols: a successive dehydration step led to the removal of 5 water molecules, leaving in the cluster 6 silanol groups, and 5 distorted Si-O-Si moieties (Figure SM5).

To perform actual calculations it was necessary to saturate all the Si valencies with 82 additional Hydrogen atoms, so that the resulting cluster stoichiometry was  $\text{Si}_{84}\text{O}_{124}\text{H}_{82}(\text{OH})_6$  (Figure SM8).

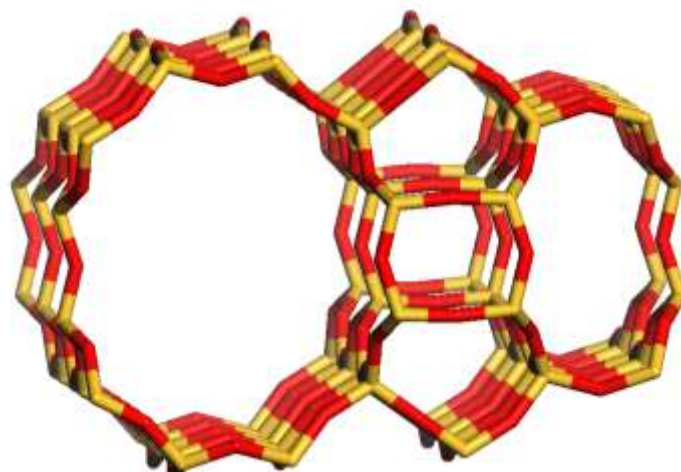

(a)

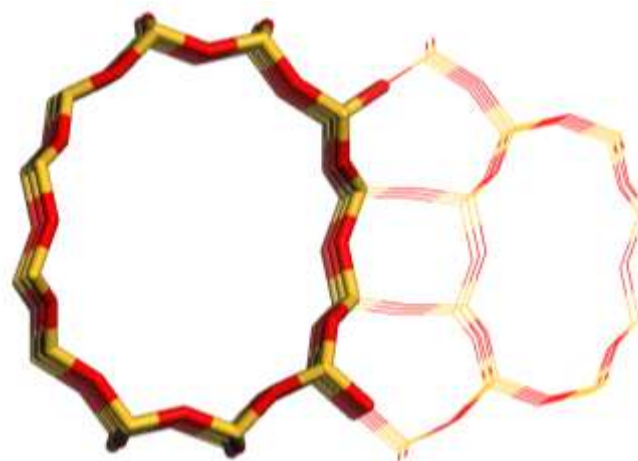

(b)

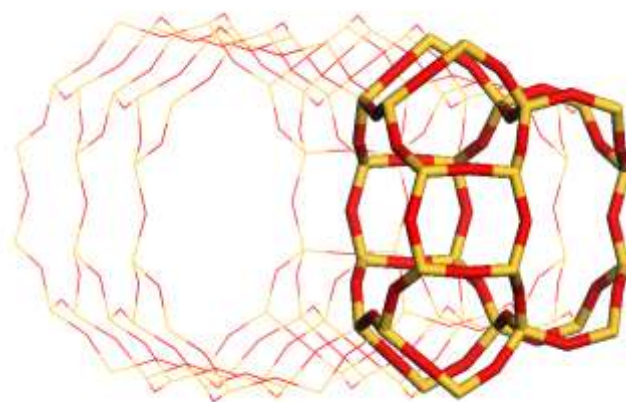

(c)

**Figure SM1.** Model cluster extracted from MOR periodic structure: (a)  $\text{Si}_{92}\text{O}_{143}$  cluster; (b) highlight of the main channel segment in the model cluster; (c) highlight of one side-pocket in the model cluster.

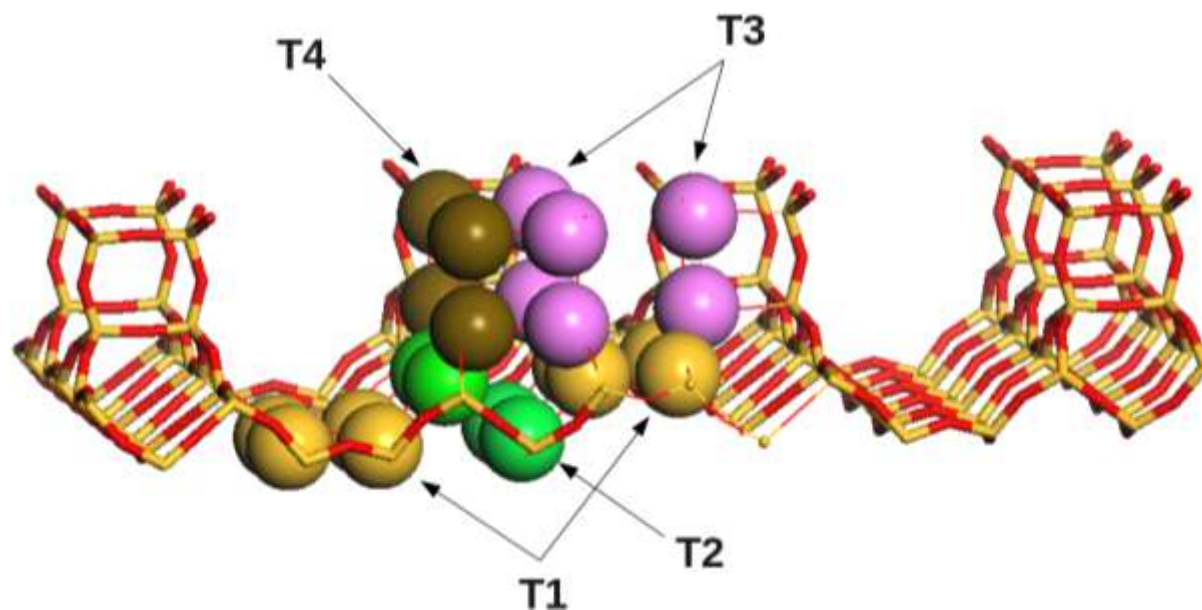

**Figure SM2.** Tetrahedral sites in the MOR structure.

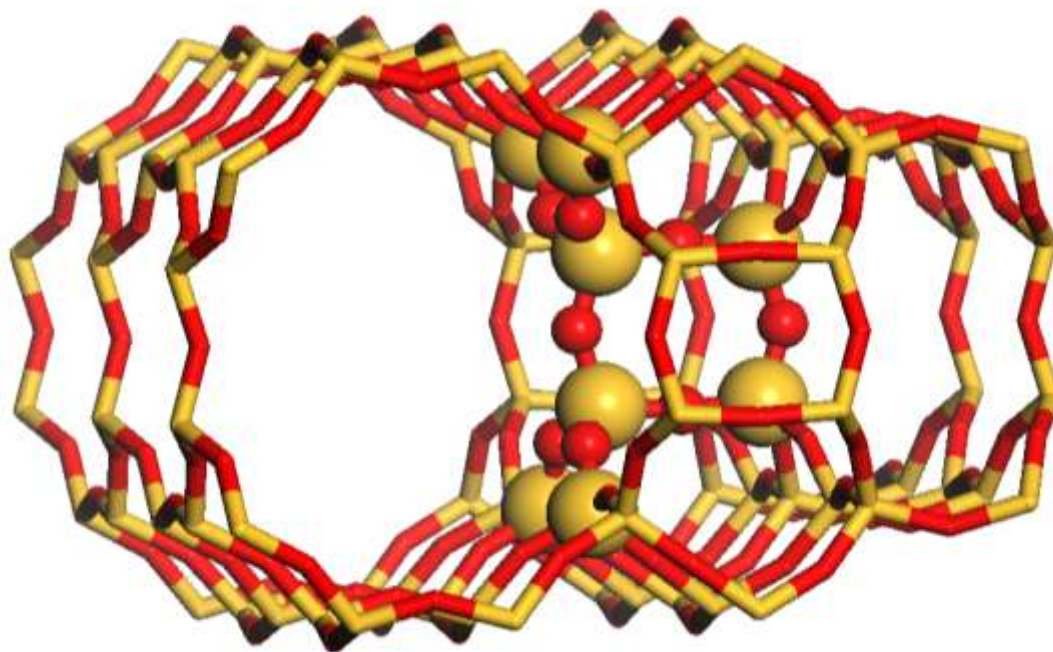

**Figure SM3.** The eight Silicon and Oxygen atoms removed to simulate the formation of defects due to the dealumination process.

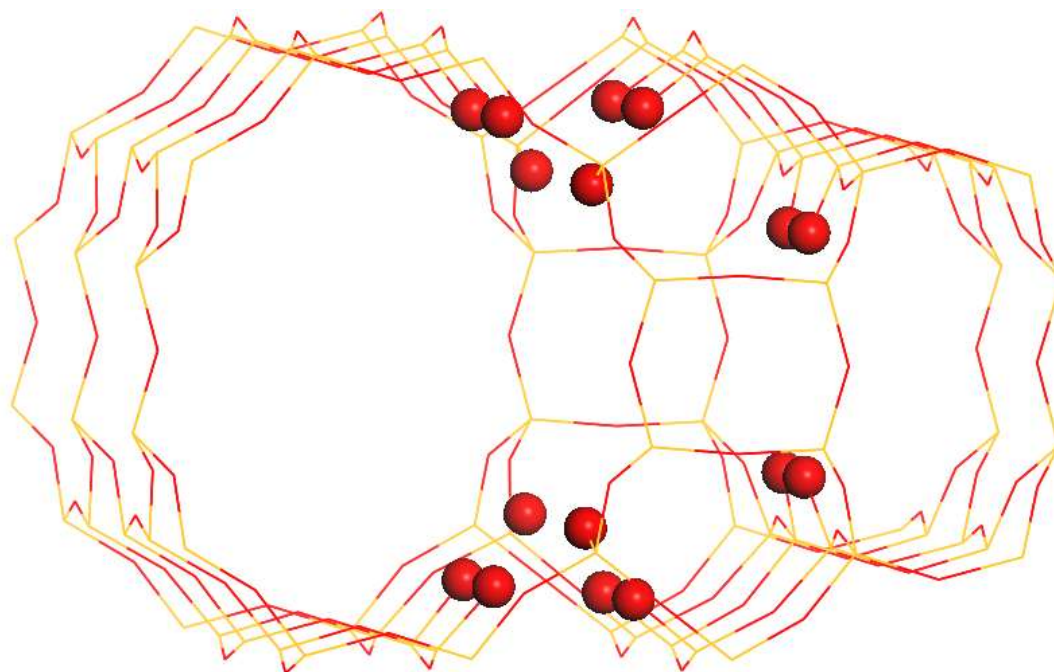

**Figure SM4.** Undercoordinated Oxygen atoms after removal of the eight tetrahedral sites. Five atoms were removed to simulate dehydration process, then five distorted Si-O-Si bridges are formed and six silanol groups are left.

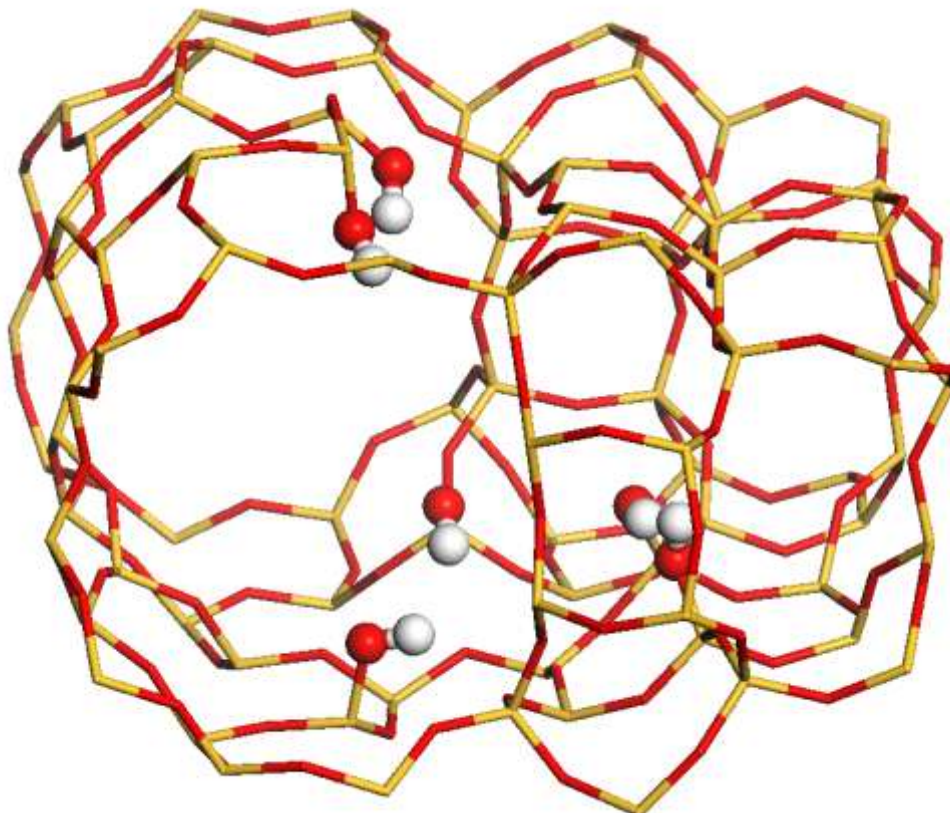

**Figure SM5.** The six silanol groups left in the model cluster after the simulated dealumination/dehydration.

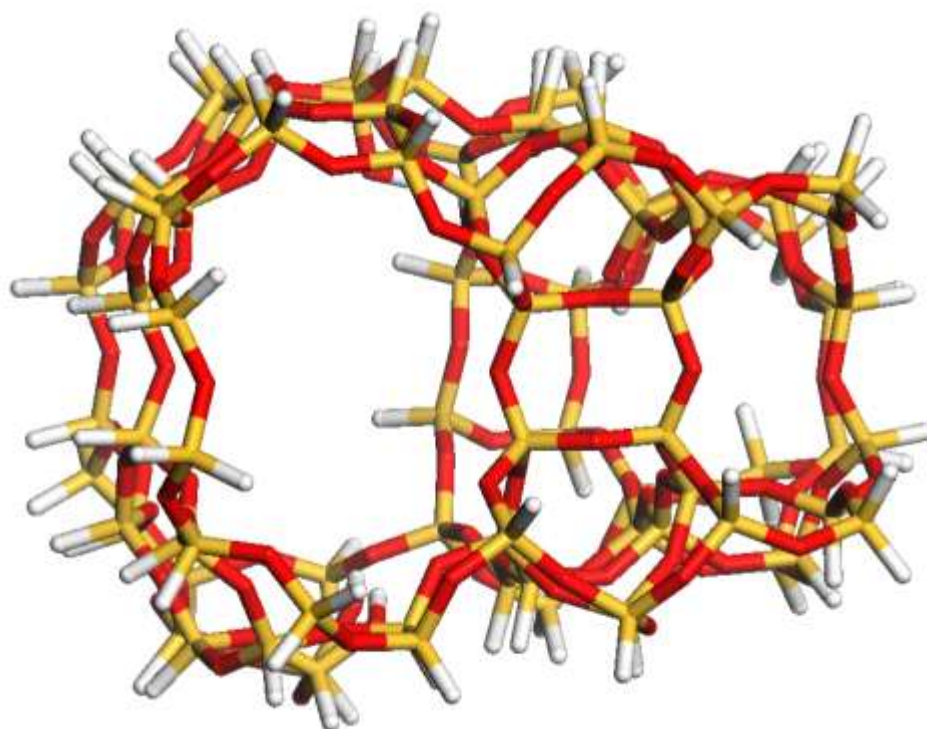

**Figure SM6.**  $\text{Si}_{84}\text{O}_{124}\text{H}_{82}(\text{OH})_6$  cluster used in actual calculations: all the “external” Silicon valencies are saturated with H.

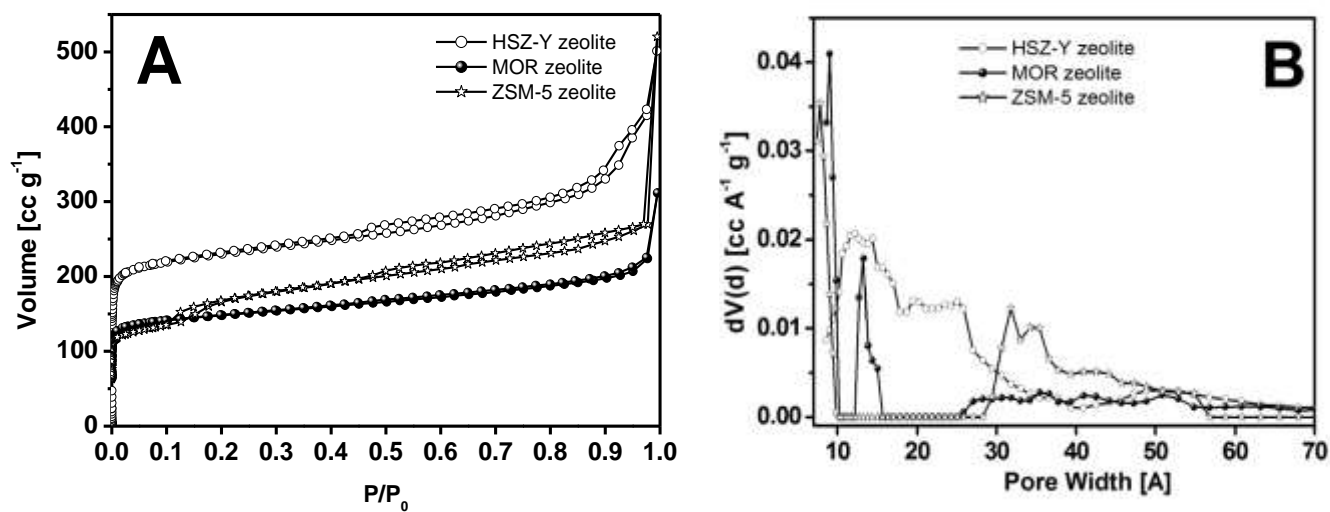

**Figure SM7.**  $N_2$  adsorption/desorption isotherms at  $-196^\circ\text{C}$  (A) and pore size distribution (B) of HSZ-Y, MOR and ZSM5 samples.

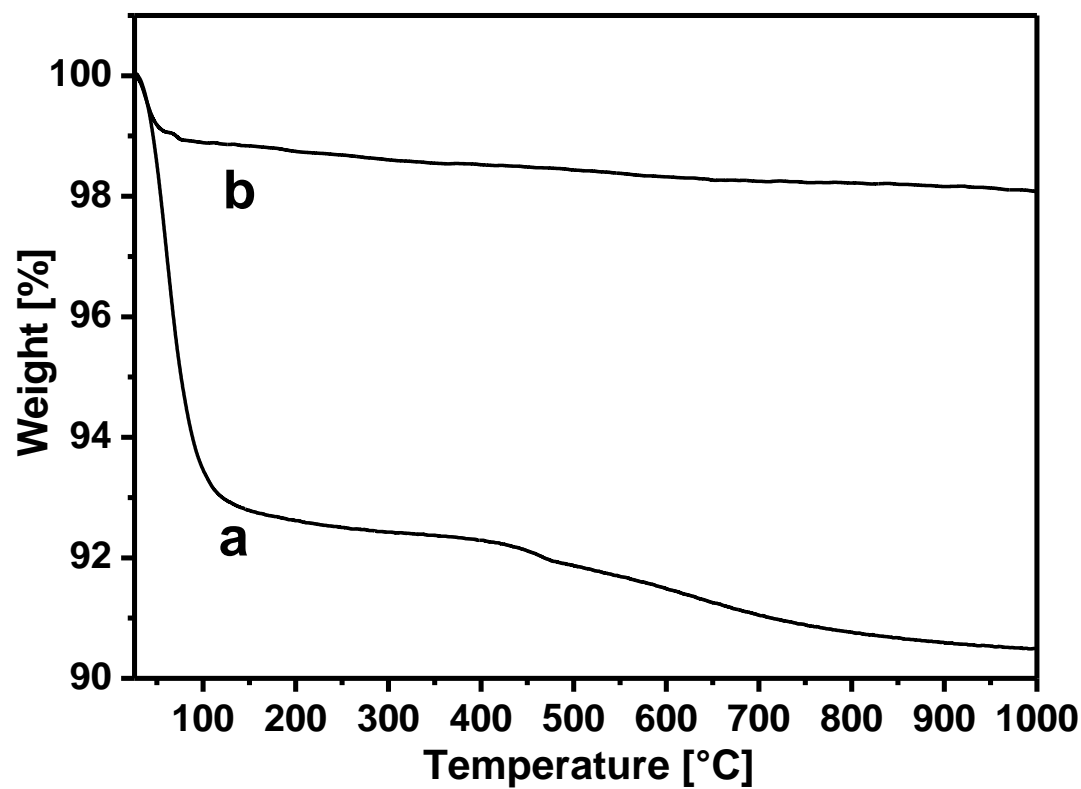

**Figure SM8.** TGA analyses of high silica MOR (a) and Y (b) zeolites recorded under O<sub>2</sub> flow (100 mL/min).

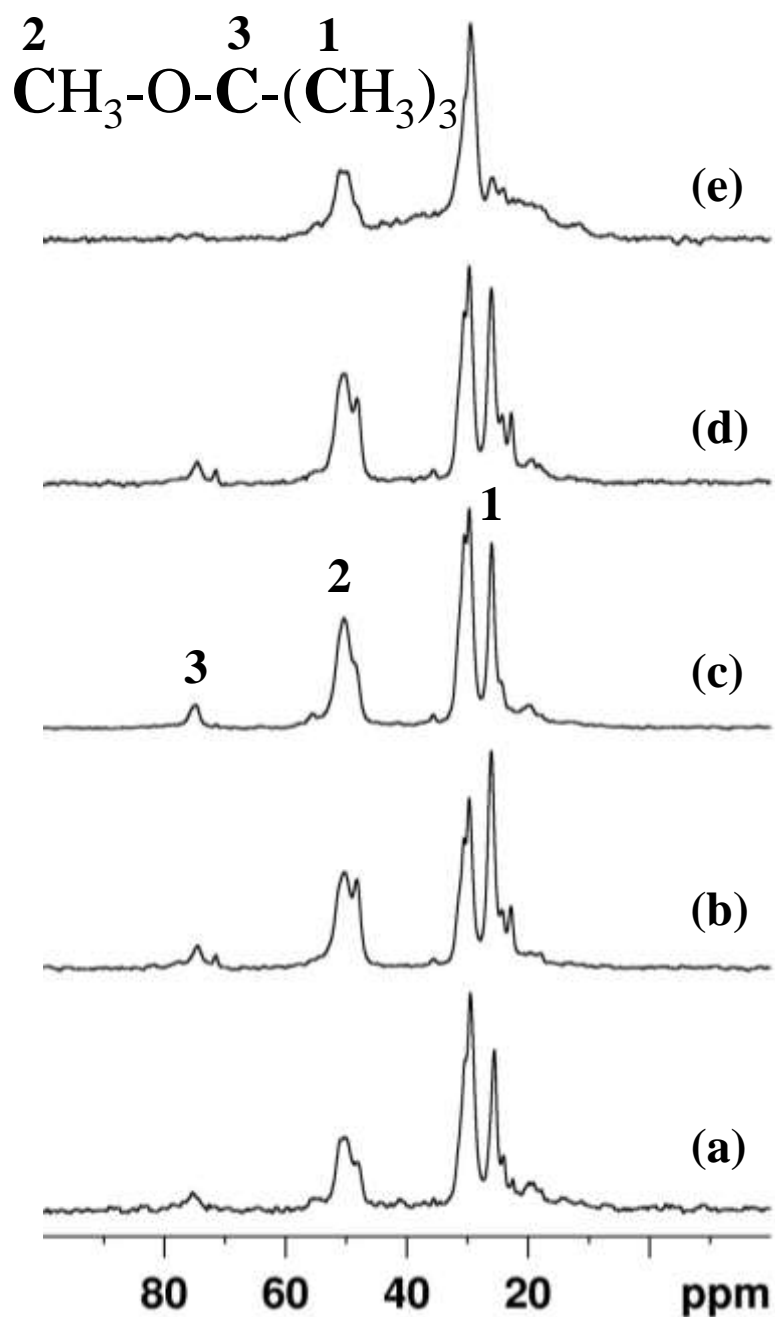

**Figure SM9.**  $^{13}\text{C}$  CPMAS NMR spectra of zeolite MOR after MTBE adsorption at 0.5 mbar (a), 5 mbar (b), 10 mbar (c) and 20 mbar (d).  $^{13}\text{C}$  CPMAS NMR spectrum recorded (previously adsorbed at 20mbar on MOR) after overnight evacuation of MTBE at RT (e). A MAS rate of 10 kHz and a CP contact time of 5 ms was used in all the experiments.

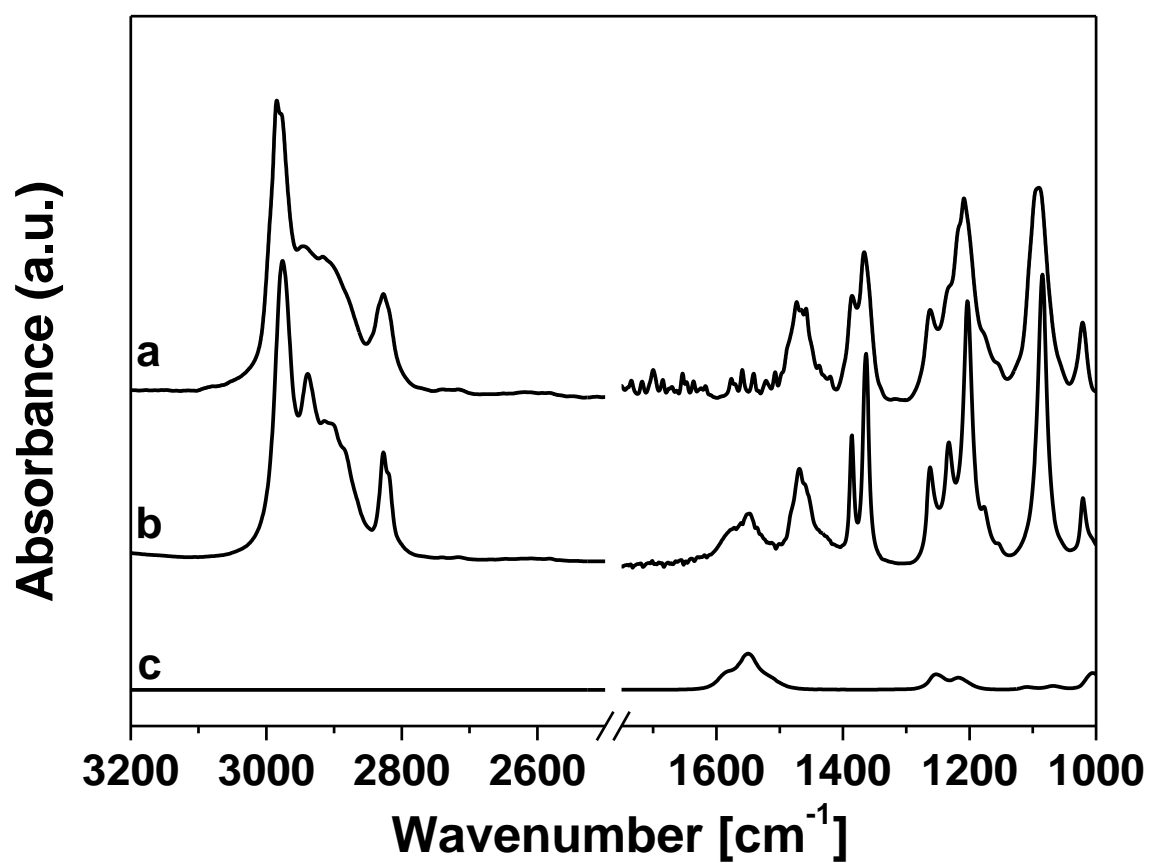

**Figure SM10.** Experimental infrared spectra of MTBE in gas phase (a) and in carbon tetrachloride solution (b). FTIR spectra of carbon tetrachloride (c).
